# Supplementary material
Source: Elsevier journal article supplement (https://www.sciencedirect.com/science/article/pii/S1413867020301471)
Supplement: mmc1 [file S1413867020301471:mmc1.docx]

**Table S1.** Intra-rater agreement according to RSNA imaging classification for COVID-19 pneumonia diagnosis.

| **Observer 1 -****first *vs.* second analysis**a | | | | | | | |
| --- | --- | --- | --- | --- | --- | --- | --- |
| *RSNA CT classification*, No. (%) | *Negative* | *Typical* | *Indeterminate* | *Atypical* | Total | *P* value | Cohen’s kappa |
| *Negative* | 24(15.1) | 0(0.0) | 0(0.0) | 1(0.6) | 25(15.7) | .13 | 0.847 |
| *Typical* | 0(0.0) | 79(49.7) | 3(1.9) | 0(0.0) | 82(51.6) |
| *Indeterminate* | 0(0.0) | 2(1.3) | 21(13.2) | 1(0.6) | 24(15.1) |
| *Atypical* | 3(1.9) | 0(0.0) | 6(3.8) | 19(11.9) | 28(17.6) |
| Total | 27(17.0) | 81(50.9) | 30(18.9) | 21(13.2) | 159(100.0) |
| **Observer 2****-****first *vs.* second analysis** b | | | | | | | |
| *RSNA CT classification*, No. (%) | *Negative* | *Typical* | *Indeterminate* | *Atypical* | Total | *P* value | Cohen’s kappa |
| *Negative* | 32(20.1) | 0(0.0) | 0(0.0) | 0(0.0) | 32(20.1) | .06 | 0.924 |
| *Typical* | 0(0.0) | 79(49.7) | 0(0.0) | 0(0.0) | 79(49.7) |
| *Indeterminate* | 3(1.9) | 0(0.0) | 28(17.6) | 2(1.3) | 33(20.8) |
| *Atypical* | 1(0.6) | 0(0.0) | 2(1.3) | 12(7.5) | 15(9.4) |
| Total | 36(22.6) | 79(49.7) | 30(18.9) | 14(8.8) | 159(100.0) |

Abbreviations: RSNA, Radiological Society of North America; COVID-19, coronavirus disease 2019; CT, computed tomography.

a Cronbach’s alpha=0,90 (internal consistency).

b Cronbach’s alpha=0,94 (internal consistency).

**Table S2**. Inter-rater agreement a according to RSNA imaging classification for COVID-19 pneumonia diagnosis.

| **Observer 1 - first analysis *vs.* Observer 2 - first analysis** | | | | | | | |
| --- | --- | --- | --- | --- | --- | --- | --- |
| *RSNA CT classification*, No. (%) | *Negative* | *Typical* | *Indeterminate* | *Atypical* | Total | *P* value | Cohen’s kappa |
| *Negative* | 24(15.1) | 0(0.0) | 3(1.9) | 5(3.1) | 32(20.1) | .007 | 0.744 |
| *Typical* | 0(0.0) | 77(48.4) | 2(1.3) | 0(0.0) | 79(49.7) |
| *Indeterminate* | 0(0.0) | 5(3.1) | 18(11.3) | 10(6.3) | 33(20.8) |
| *Atypical* | 1(0.6) | 0(0.0) | 1(0.6) | 13(8.2) | 15(9.4) |
| Total | 25(15.7) | 82(51.6) | 24(15.1) | 28(17.6) | 159(100.0) |
| **Observer 1 - first analysis *vs.* Observer 2 - second analysis** | | | | | | | |
| *RSNA CT classification*, No. (%) | *Negative* | *Typical* | *Indeterminate* | *Atypical* | Total | *P* value | Cohen’s kappa |
| *Negative* | 24(15.1) | 1(0.6) | 4(2.5) | 7(4.4) | 36(22.6) | .001 | 0.725 |
| *Typical* | 0(0.0) | 77(48.4) | 2(1.3) | 0(0.0) | 79(49.7) |
| *Indeterminate* | 0(0.0) | 4(2.5) | 17(10.7) | 9(5.7) | 30(18.9) |
| *Atypical* | 1(0.6) | 0(0.0) | 1(0.6) | 12(7.5) | 14(8.8) |
| Total | 25(15.7) | 82(51.6) | 24(15.1) | 28(17.6) | 159(100.0) |
| **Observer 1 - second analysis *vs.* Observer 2 - first analysis** | | | | | | | |
| *RSNA CT classification*, No. (%) | *Negative* | *Typical* | *Indeterminate* | *Atypical* | Total | *P* value | Cohen’s kappa |
| *Negative* | 26(16.4) | 0(0.0) | 0(0.0) | 1(0.6) | 27(17.0) | .05 | 0.772 |
| *Typical* | 0(0.0) | 78(49.1) | 3(1.9) | 0(0.0) | 81(50.9) |
| *Indeterminate* | 4(2.5) | 1(0.6) | 21(13.2) | 4(2.5) | 30(18.9) |
| *Atypical* | 2(1.3) | 0(0.0) | 9(5.7) | 10(6.3) | 21(13.2) |
| Total | 32(20.1) | 79(49.7) | 33(20.8) | 15(9.4) | 159(100.0) |

(continued)

**Table S2**. Inter-rater agreement a according to RSNA imaging classification for COVID-19 pneumonia diagnosis (continued).

| **Observer 1 - second analysis *vs.* Observer 2 - second analysis** | | | | | | | |
| --- | --- | --- | --- | --- | --- | --- | --- |
| *RSNA CT classification*, No. (%) | *Negative* | *Typical* | *Indeterminate* | *Atypical* | Total | *P* value | Cohen’s kappa |
| *Negative* | 26(16.4) | 0(0.0) | 0(0.0) | 1(0.6) | 27(17.0) | .01 | 0.743 |
| *Typical* | 0(0.0) | 78(49.1) | 3(1.9) | 0(0.0) | 81(50.9) |
| *Indeterminate* | 6(3.8) | 1(0.6) | 19(11.9) | 4(2.5) | 30(18.9) |
| *Atypical* | 4(2.5) | 0(0.0) | 8(5.0) | 9(5.7) | 21(13.2) |
| Total | 36(22.6) | 79(49.7) | 30(18.9) | 14(8.8) | 159(100.0) |

Abbreviations: RSNA, Radiological Society of North America; COVID-19, coronavirus disease 2019; CT, computed tomography.

a Overall Cronbach’s alpha=0,92 (internal consistency).

**Table S3.** Internal consistency, intra and inter-rater agreement of relevant typical findings a.

| **Typical findings** | **Cohen’s kappa coefficient (range)** | **Overall Cronbach’s alpha coefficient** |
| --- | --- | --- |
| Multifocal GGO | 0.757-0.848 | 0.941 |
| Rounded GGO | 0.649-0.849 | 0.922 |
| Crazy-paving | 0.363-0.774 | 0.866 |
| Perilobular pattern | 0.309-0.768 | 0.839 |

Abbreviations: GGO, ground glass opacities.

Please, refer to table 2 to assess prevalence, sensitivity and specificity of typical CT findings.

a Findings were selected to be included according to the relevance to the characterization of patients with COVID-19.
